# Supplementary material for: Abundance of megalin and Dab2 is reduced in syncytiotrophoblast during placental malaria, which may contribute to low birth weight
Source: PubMed Central journal article supplement (PMC4829923; doi:10.1038/srep24508), 2016-04-13
Supplement: srep24508-s1.pdf [file srep24508-s1.pdf]

**Supplementary Information**

**Abundance of megalin and Dab2 is reduced in syncytiotrophoblast during placental malaria, which may contribute to low birth weight**

Jared Lybbert<sup>1</sup>, Justin Gullingsrud<sup>2</sup>, Olga Chesnokov<sup>1</sup>, Eleanor Turyakira<sup>3</sup>, Mehul Dhorda<sup>4,5</sup>,  
Philippe J. Guerin<sup>4,5</sup>, Patrice Piola<sup>5</sup>, Atis Muehlenbachs<sup>6</sup>, Andrew V. Oleinikov<sup>1,2,\*</sup>

**Supplementary Table S1. Clinical information on placental sections and corresponding babies and women.** Parasite – parasites found in placenta at delivery; hemozoin – extracellular hemozoin in fibrin found in placenta indicating previous (resolved) placental infection; inflammation – inflammatory cells found in placenta; birth weight – measured at delivery; parity indicates previous pregnancies. Abbreviations: y – yes, n – no, n/a – not available, Hgb – hemoglobin, AL – artemether-lumefantrine, Q – quinine, LBW – low birth weight

| Sample # | Parasite | Hemozoin | Inflammation | Birth weight, g | Parity | Hgb  | Study Arm | Notes       |
|----------|----------|----------|--------------|-----------------|--------|------|-----------|-------------|
| 1        | n        | n        | n            | 3180            | 1      | 11.7 | AL        |             |
| 2        | n        | n        | n            | 2490            | 0      | 11.9 | AL        | LBW         |
| 3        | n        | y        | n            | 2310            | 1      | 12.0 | AL        | LBW         |
| 4        | n        | n        | n            | 3470            | 0      | 9.7  | Q         |             |
| 5        | n        | n        | n            | 2040            | 0      | 11.1 | Q         | LBW         |
| 6        | y        | y        | n            | 2430            | 0      | 8.8  | AL        | LBW         |
| 7        | y        | y        | n            | 2430            | 2      | 11.0 | Q         | LBW         |
| 8        | y        | y        | n            | 3300            | 0      | 11.6 | AL        |             |
| 9        | n        | n        | n            | 3050            | 1      | 12.8 | AL        |             |
| 10       | y        | y        | n            | 3150            | 1      | 13.0 | AL        |             |
| 11       | n        | n        | n            | 3810            | 0      | 11.3 | Q         |             |
| 12       | n        | n        | n            | 2880            | 1      | 9.8  | Q         |             |
| 13       | n        | n        | n            | 3500            | 0      | 16.0 | Q         |             |
| 14       | n        | n        | n            | 2000            | 3      | 5.8  | Q         | LBW         |
| 15       | y        | n        | n            | 3400            | 1      | 8.0  | Q         |             |
| 16       | y        | y        | y            | n/a             | 1      | n/a  | AL        | Stillbirth* |
| 17       | n        | n        | n            | 2900            | 2      | 10.7 | Q         |             |
| 18       | n        | n        | n            | 2880            | 0      | 10.2 | Q         |             |
| 19       | n        | n        | y            | 2770            | 1      | 12.3 | Q         |             |
| 20       | n        | y        | n            | 2860            | 0      | 10.1 | AL        |             |
| 21       | n        | n        | n            | 3240            | 2+     | 13.8 | Q         |             |
| 22       | n        | n        | n            | 3280            | 1      | 13.3 | Q         |             |
| 23       | n        | n        | n            | n/a             | n/a    | n/a  |           |             |
| 24       | y        | y        | y            | n/a             | n/a    | n/a  |           |             |
| 25       | y        | y        | y            | n/a             | n/a    | n/a  |           |             |
| 26       | n        | y        | n            | n/a             | n/a    | n/a  |           |             |
| 27       | n        | n        | n            | n/a             | n/a    | n/a  |           |             |
| 28       | n        | n        | n            | n/a             | n/a    | n/a  |           |             |

\*This sample was included in categorical analysis as low birth weight

## **Supplementary Figure Legends**

**Supplementary Figure S1. Strong correlation of protein abundance measurements in sections of placental samples obtained in independent blind experiments using two different antibody preparations.** A, megalin measurements. B, Dab2 measurements.

**Supplementary Figure S2. Parity is not a confounding factor in association of placental infection with reduced abundance of megalin and Dab2.** Samples with data on parity (n=22, Supplementary Table 1) were used for this analysis. Red bars, medians. PE, infected erythrocytes in placenta at the time of delivery.

**Supplementary Figure S3. Quantification of protein abundance in syncytiotrophoblast.** Selected region A indicates brush border area, and region A+B indicates entire syncytiotrophoblast. Three areas like this per section were selected and used for measurements with each antibody. Results were averaged.

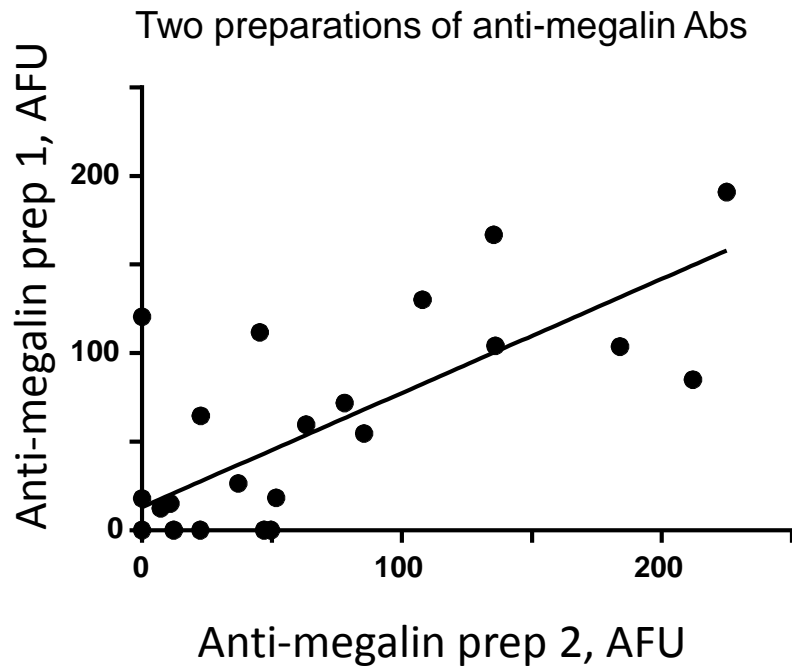

Spearman correlation  $r=0.69$ ,  $p<0.0001$   
Line shows linear regression

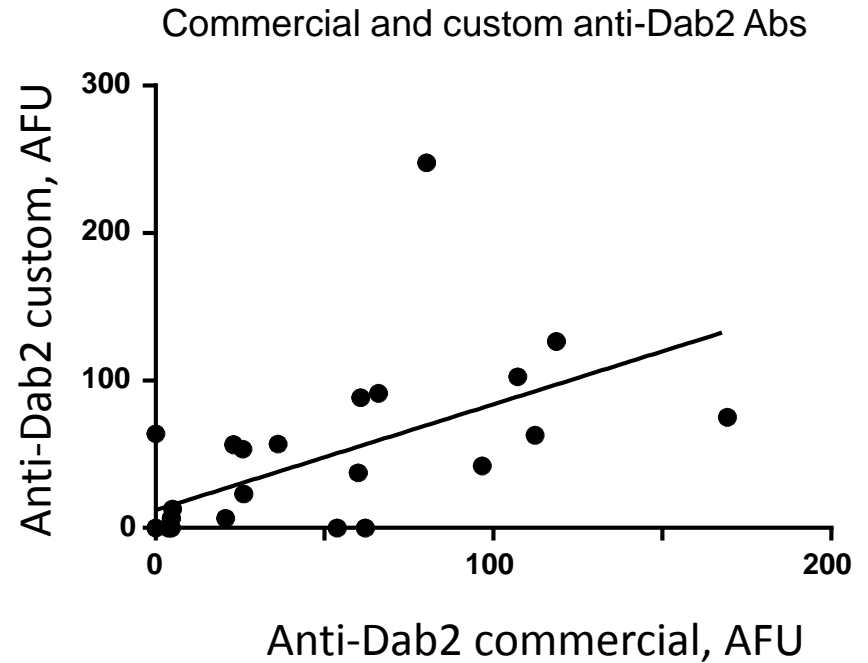

Spearman correlation  $r=0.73$ ,  $p<0.0001$   
Line shows linear regression

**Supplementary Figure S1. Strong correlation of protein abundance measurements in sections of placental samples obtained in independent blind experiments using two different antibody preparations. A, megalin measurements. B, Dab2 measurements.**

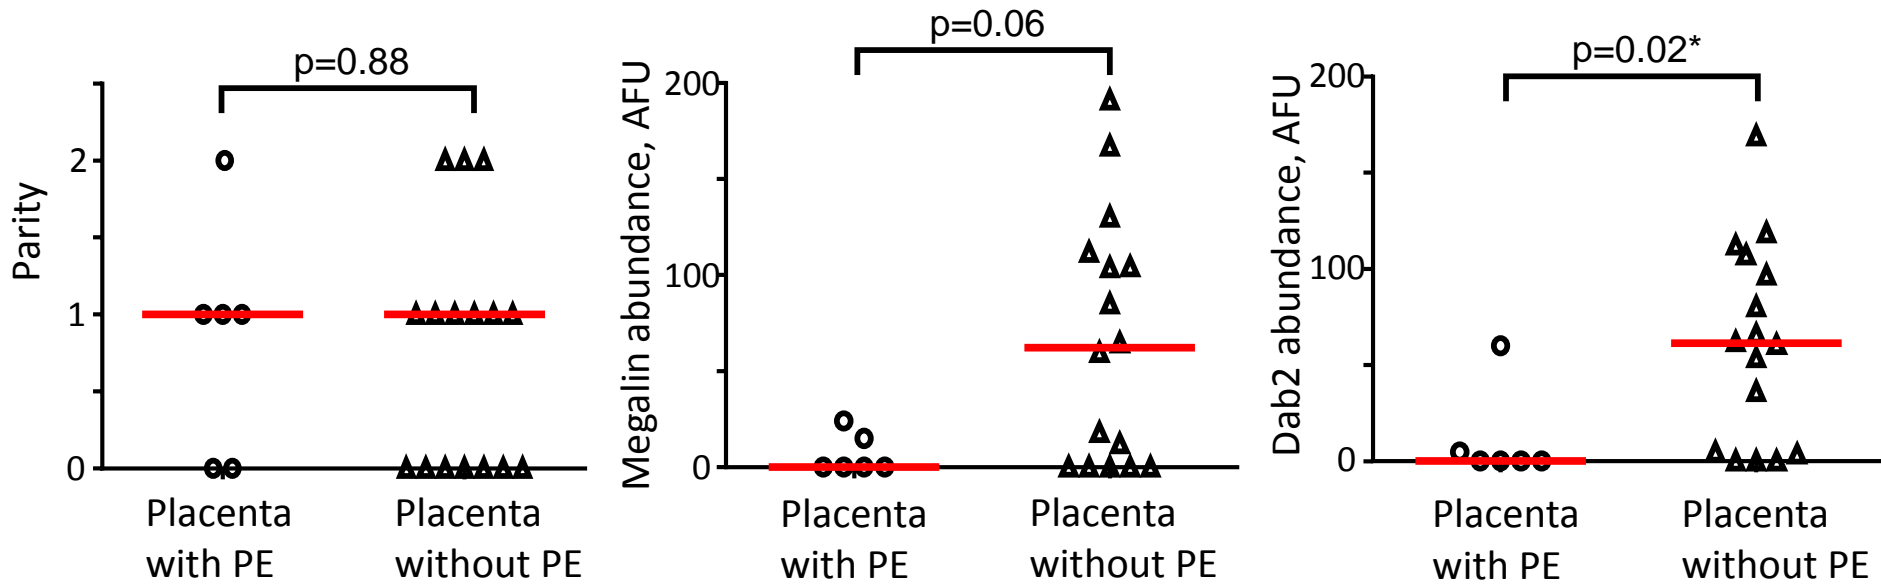

**Supplementary Figure S2. Parity is not a confounding factor in association of placental infection with reduced abundance of megalin and Dab2.** Samples with data on parity (n=22, Supplementary Table 1) were used for this analysis. Red bars, medians. PE, infected erythrocytes in placenta at the time of delivery.

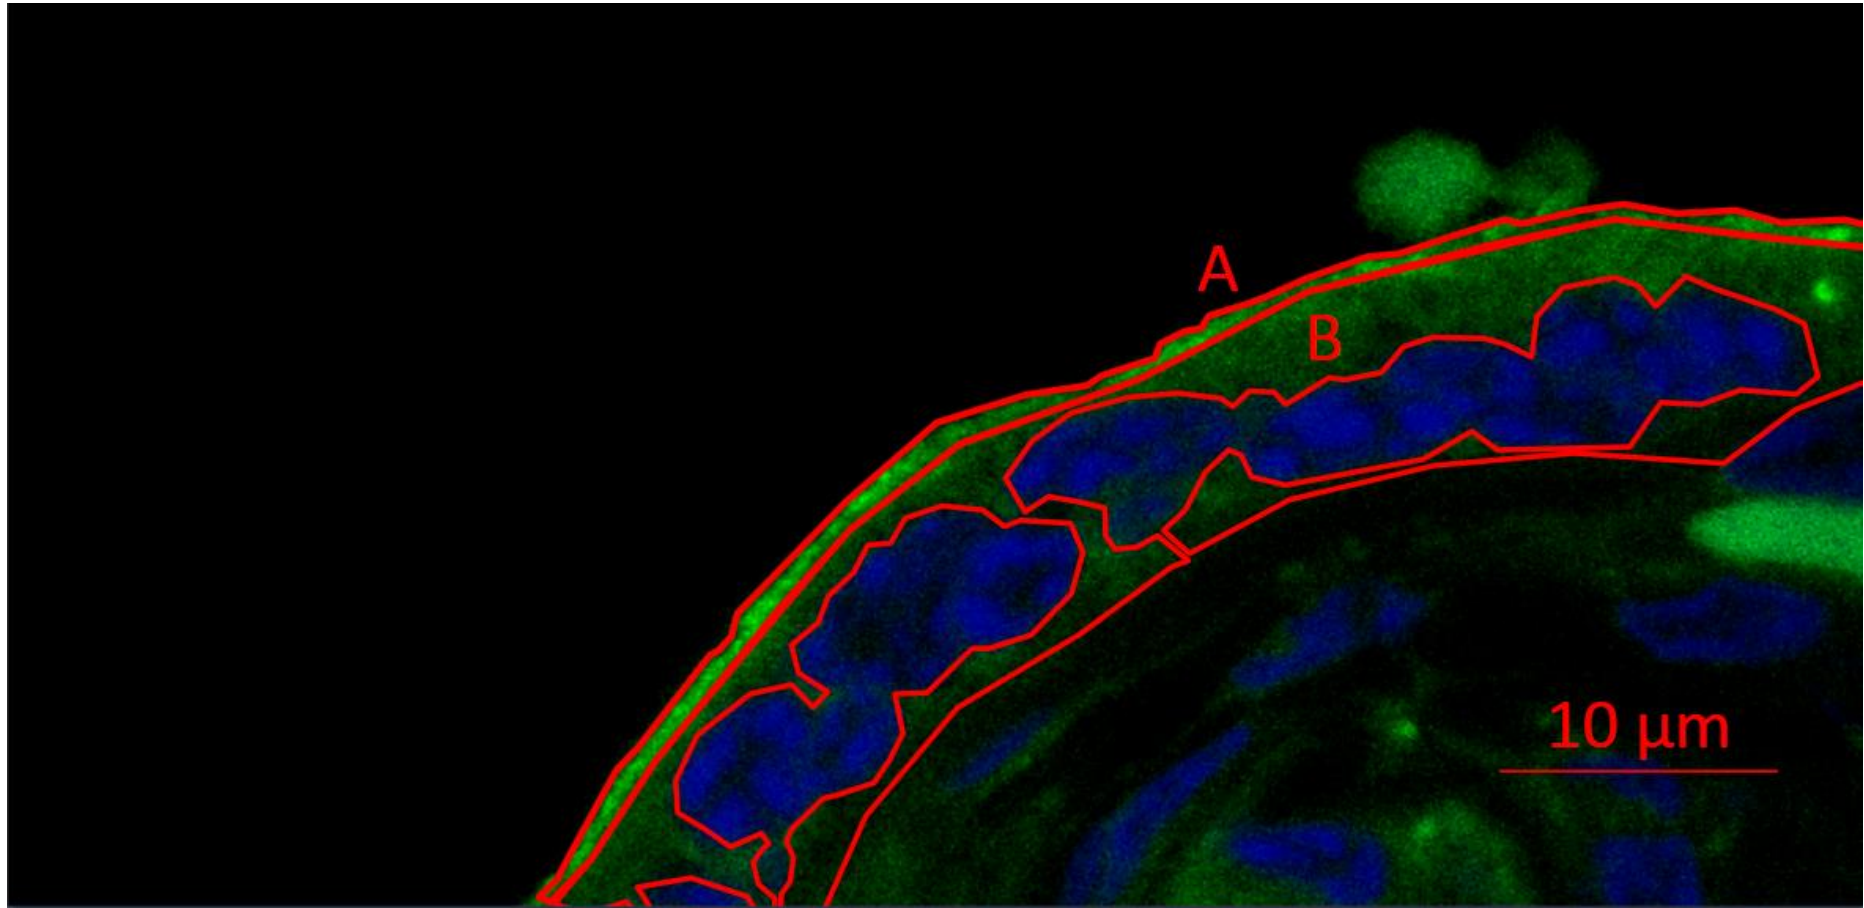

**Supplementary Figure S3. Quantification of protein abundance in syncytiotrophoblast.** Selected region A indicates brush border area, and region A+B indicates entire syncytiotrophoblast. Three areas like this per section were selected and used for measurements with each antibody. Results were averaged.
